# Supplementary material for: Influence of the Composition on the Environmental Impact of Soft Ferrites
Source: MDPI journal article supplement (doi:10.3390/ma11101789), 2018-09-20
Supplement: s1 [file s1]

## Supplementary Materials: Influence of the Composition on the Environmental Impact of Soft Ferrites

Patricia Gómez, Daniel Elduque, Carmelo Pina and Carlos Javierre

**Table S1.** MnZn ferrites analysis (composition percentages, environmental impacts of both methodologies, and material and production percentages in both methodologies).

| Composition (%)                |        |        |                  |                                          | ReCiPe (%)                         |         |         |            | IPCC 2013 GWP 100y (%)             |         |         |            |
|--------------------------------|--------|--------|------------------|------------------------------------------|------------------------------------|---------|---------|------------|------------------------------------|---------|---------|------------|
| Fe <sub>2</sub> O <sub>3</sub> | ZnO    | MnO    | ReCiPe<br>(mPts) | IPCC<br>2013 (Kg<br>CO <sub>2</sub> eq.) | Fe <sub>2</sub> O <sub>3</sub> RMA | ZnO RMA | MnO RMA | Production | Fe <sub>2</sub> O <sub>3</sub> RMA | ZnO RMA | MnO RMA | Production |
| 76.50%                         | 6.50%  | 17.00% | 1571.6           | 1.0257                                   | 3.63%                              | 0.41%   | 94.85%  | 1.11%      | 10.16%                             | 5.63%   | 59.51%  | 24.71%     |
| 75.70%                         | 7.20%  | 17.10% | 1580.5           | 1.0344                                   | 3.57%                              | 0.45%   | 94.88%  | 1.10%      | 9.97%                              | 6.18%   | 59.35%  | 24.50%     |
| 74.89%                         | 7.90%  | 17.21% | 1590.0           | 1.0435                                   | 3.51%                              | 0.49%   | 94.90%  | 1.10%      | 9.77%                              | 6.73%   | 59.21%  | 24.29%     |
| 74.07%                         | 8.62%  | 17.32% | 1599.7           | 1.0526                                   | 3.45%                              | 0.53%   | 94.93%  | 1.09%      | 9.58%                              | 7.27%   | 59.07%  | 24.08%     |
| 73.23%                         | 9.34%  | 17.43% | 1609.6           | 1.0619                                   | 3.39%                              | 0.58%   | 94.95%  | 1.08%      | 9.39%                              | 7.81%   | 58.93%  | 23.87%     |
| 72.39%                         | 10.07% | 17.54% | 1619.5           | 1.0712                                   | 3.33%                              | 0.62%   | 94.98%  | 1.08%      | 9.20%                              | 8.35%   | 58.79%  | 23.66%     |
| 71.54%                         | 10.81% | 17.65% | 1629.6           | 1.0808                                   | 3.27%                              | 0.66%   | 95.00%  | 1.07%      | 9.01%                              | 8.88%   | 58.65%  | 23.45%     |
| 75.77%                         | 6.55%  | 17.68% | 1631.1           | 1.0497                                   | 3.46%                              | 0.40%   | 95.07%  | 1.07%      | 9.83%                              | 5.54%   | 60.49%  | 24.14%     |
| 70.67%                         | 11.56% | 17.77% | 1639.8           | 1.0904                                   | 3.21%                              | 0.70%   | 95.03%  | 1.06%      | 8.83%                              | 9.42%   | 58.51%  | 23.24%     |
| 74.95%                         | 7.25%  | 17.80% | 1641.1           | 1.0589                                   | 3.40%                              | 0.44%   | 95.10%  | 1.06%      | 9.64%                              | 6.08%   | 60.34%  | 23.94%     |
| 69.79%                         | 12.32% | 17.89% | 1650.2           | 1.1001                                   | 3.15%                              | 0.74%   | 95.05%  | 1.06%      | 8.64%                              | 9.95%   | 58.38%  | 23.04%     |
| 74.13%                         | 7.96%  | 17.91% | 1651.1           | 1.0681                                   | 3.34%                              | 0.48%   | 95.12%  | 1.06%      | 9.45%                              | 6.62%   | 60.20%  | 23.73%     |
| 68.90%                         | 13.09% | 18.01% | 1660.6           | 1.1100                                   | 3.09%                              | 0.78%   | 95.08%  | 1.05%      | 8.45%                              | 10.48%  | 58.24%  | 22.83%     |
| 73.30%                         | 8.68%  | 18.02% | 1661.3           | 1.0775                                   | 3.29%                              | 0.52%   | 95.14%  | 1.05%      | 9.26%                              | 7.15%   | 60.06%  | 23.52%     |
| 68.00%                         | 13.87% | 18.13% | 1671.3           | 1.1200                                   | 3.03%                              | 0.82%   | 95.10%  | 1.04%      | 8.27%                              | 11.00%  | 58.10%  | 22.63%     |
| 72.45%                         | 9.41%  | 18.14% | 1671.6           | 1.0870                                   | 3.23%                              | 0.56%   | 95.17%  | 1.04%      | 9.08%                              | 7.69%   | 59.92%  | 23.32%     |
| 71.60%                         | 10.14% | 18.26% | 1682.0           | 1.0966                                   | 3.17%                              | 0.60%   | 95.19%  | 1.04%      | 8.89%                              | 8.22%   | 59.78%  | 23.11%     |
| 70.73%                         | 10.89% | 18.38% | 1692.5           | 1.1064                                   | 3.11%                              | 0.64%   | 95.22%  | 1.03%      | 8.71%                              | 8.74%   | 59.64%  | 22.91%     |

|        |        |        |        |        |       |       |        |       |       |        |        |        |
|--------|--------|--------|--------|--------|-------|-------|--------|-------|-------|--------|--------|--------|
| 75.02% | 6.60%  | 18.39% | 1692.2 | 1.0743 | 3.30% | 0.39% | 95.28% | 1.03% | 9.51% | 5.45%  | 61.45% | 23.59% |
| 69.85% | 11.65% | 18.50% | 1703.3 | 1.1162 | 3.06% | 0.68% | 95.24% | 1.02% | 8.52% | 9.27%  | 59.50% | 22.71% |
| 74.19% | 7.30%  | 18.50% | 1702.5 | 1.0837 | 3.25% | 0.43% | 95.30% | 1.02% | 9.32% | 5.99%  | 61.30% | 23.39% |
| 68.96% | 12.41% | 18.62% | 1714.1 | 1.1262 | 3.00% | 0.72% | 95.27% | 1.02% | 8.34% | 9.79%  | 59.37% | 22.50% |
| 73.36% | 8.02%  | 18.62% | 1713.0 | 1.0932 | 3.19% | 0.46% | 95.33% | 1.02% | 9.14% | 6.51%  | 61.16% | 23.18% |
| 72.52% | 8.74%  | 18.74% | 1723.7 | 1.1028 | 3.13% | 0.50% | 95.35% | 1.01% | 8.95% | 7.04%  | 61.02% | 22.98% |
| 68.06% | 13.19% | 18.75% | 1725.1 | 1.1364 | 2.94% | 0.76% | 95.29% | 1.01% | 8.16% | 10.31% | 59.23% | 22.30% |
| 71.66% | 9.48%  | 18.86% | 1734.5 | 1.1125 | 3.08% | 0.54% | 95.37% | 1.01% | 8.77% | 7.57%  | 60.88% | 22.78% |
| 70.79% | 10.22% | 18.99% | 1745.4 | 1.1224 | 3.02% | 0.58% | 95.40% | 1.00% | 8.59% | 8.09%  | 60.74% | 22.58% |
| 74.26% | 6.64%  | 19.10% | 1754.1 | 1.0993 | 3.15% | 0.38% | 95.48% | 0.99% | 9.20% | 5.37%  | 62.38% | 23.06% |
| 69.92% | 10.97% | 19.11% | 1756.4 | 1.1323 | 2.97% | 0.62% | 95.42% | 0.99% | 8.41% | 8.61%  | 60.60% | 22.38% |
| 73.42% | 7.36%  | 19.22% | 1764.9 | 1.1089 | 3.10% | 0.41% | 95.50% | 0.99% | 9.02% | 5.89%  | 62.23% | 22.86% |
| 69.03% | 11.73% | 19.24% | 1767.6 | 1.1425 | 2.91% | 0.66% | 95.45% | 0.99% | 8.23% | 9.12%  | 60.46% | 22.18% |
| 72.58% | 8.08%  | 19.35% | 1775.9 | 1.1186 | 3.04% | 0.45% | 95.52% | 0.98% | 8.84% | 6.41%  | 62.09% | 22.66% |
| 68.12% | 12.51% | 19.37% | 1779.0 | 1.1527 | 2.85% | 0.70% | 95.47% | 0.98% | 8.05% | 9.64%  | 60.33% | 21.99% |
| 71.72% | 8.81%  | 19.47% | 1787.0 | 1.1284 | 2.99% | 0.49% | 95.55% | 0.98% | 8.65% | 6.93%  | 61.95% | 22.46% |
| 70.86% | 9.55%  | 19.60% | 1798.3 | 1.1384 | 2.94% | 0.53% | 95.57% | 0.97% | 8.48% | 7.45%  | 61.81% | 22.26% |
| 69.98% | 10.30% | 19.73% | 1809.7 | 1.1485 | 2.88% | 0.56% | 95.59% | 0.96% | 8.30% | 7.96%  | 61.67% | 22.07% |
| 73.49% | 6.69%  | 19.82% | 1816.9 | 1.1246 | 3.01% | 0.37% | 95.66% | 0.96% | 8.90% | 5.29%  | 63.28% | 22.54% |
| 69.09% | 11.05% | 19.86% | 1821.3 | 1.1587 | 2.83% | 0.60% | 95.61% | 0.96% | 8.12% | 8.47%  | 61.53% | 21.87% |
| 72.64% | 7.41%  | 19.95% | 1828.2 | 1.1344 | 2.96% | 0.40% | 95.68% | 0.95% | 8.72% | 5.80%  | 63.14% | 22.34% |
| 68.18% | 11.82% | 19.99% | 1833.0 | 1.1691 | 2.77% | 0.64% | 95.64% | 0.95% | 7.94% | 8.98%  | 61.40% | 21.68% |
| 70.00% | 10.00% | 20.00% | 1833.3 | 1.1557 | 2.84% | 0.54% | 95.66% | 0.95% | 8.25% | 7.69%  | 62.14% | 21.93% |
| 71.79% | 8.14%  | 20.08% | 1839.7 | 1.1444 | 2.91% | 0.44% | 95.71% | 0.95% | 8.54% | 6.31%  | 63.00% | 22.15% |
| 70.92% | 8.87%  | 20.21% | 1851.3 | 1.1545 | 2.85% | 0.48% | 95.73% | 0.94% | 8.36% | 6.83%  | 62.85% | 21.95% |
| 70.04% | 9.62%  | 20.34% | 1863.1 | 1.1647 | 2.80% | 0.51% | 95.75% | 0.94% | 8.19% | 7.33%  | 62.71% | 21.76% |
| 69.15% | 10.37% | 20.48% | 1875.0 | 1.1750 | 2.75% | 0.55% | 95.77% | 0.93% | 8.01% | 7.84%  | 62.58% | 21.57% |
| 72.70% | 6.74%  | 20.55% | 1880.6 | 1.1503 | 2.88% | 0.36% | 95.84% | 0.93% | 8.61% | 5.21%  | 64.15% | 22.03% |

|        |        |        |        |        |       |       |        |       |       |       |        |        |
|--------|--------|--------|--------|--------|-------|-------|--------|-------|-------|-------|--------|--------|
| 68.25% | 11.14% | 20.62% | 1887.1 | 1.1855 | 2.69% | 0.59% | 95.80% | 0.92% | 7.84% | 8.35% | 62.44% | 21.38% |
| 71.85% | 7.46%  | 20.69% | 1892.4 | 1.1603 | 2.83% | 0.39% | 95.86% | 0.92% | 8.43% | 5.71% | 64.01% | 21.84% |
| 70.98% | 8.20%  | 20.82% | 1904.4 | 1.1705 | 2.78% | 0.43% | 95.88% | 0.92% | 8.26% | 6.22% | 63.87% | 21.65% |
| 70.10% | 8.94%  | 20.96% | 1916.6 | 1.1809 | 2.72% | 0.46% | 95.90% | 0.91% | 8.08% | 6.72% | 63.73% | 21.46% |
| 69.21% | 9.69%  | 21.10% | 1928.9 | 1.1913 | 2.67% | 0.50% | 95.92% | 0.90% | 7.91% | 7.22% | 63.59% | 21.27% |
| 68.31% | 10.45% | 21.24% | 1941.3 | 1.2019 | 2.62% | 0.53% | 95.95% | 0.90% | 7.74% | 7.72% | 63.45% | 21.09% |
| 71.91% | 6.79%  | 21.30% | 1945.3 | 1.1763 | 2.75% | 0.35% | 96.00% | 0.90% | 8.32% | 5.13% | 65.00% | 21.55% |
| 71.04% | 7.52%  | 21.44% | 1957.6 | 1.1867 | 2.70% | 0.38% | 96.02% | 0.89% | 8.15% | 5.63% | 64.86% | 21.36% |
| 70.16% | 8.26%  | 21.58% | 1970.1 | 1.1971 | 2.65% | 0.42% | 96.05% | 0.88% | 7.98% | 6.13% | 64.72% | 21.17% |
| 69.27% | 9.01%  | 21.72% | 1982.8 | 1.2077 | 2.60% | 0.45% | 96.07% | 0.88% | 7.81% | 6.62% | 64.58% | 20.99% |
| 68.37% | 9.76%  | 21.87% | 1995.6 | 1.2184 | 2.55% | 0.49% | 96.09% | 0.87% | 7.64% | 7.12% | 64.44% | 20.80% |
| 71.11% | 6.84%  | 22.05% | 2010.9 | 1.2028 | 2.63% | 0.34% | 96.16% | 0.87% | 8.05% | 5.05% | 65.83% | 21.07% |
| 70.23% | 7.58%  | 22.20% | 2023.8 | 1.2134 | 2.59% | 0.37% | 96.18% | 0.86% | 7.88% | 5.55% | 65.68% | 20.89% |
| 69.33% | 8.32%  | 22.35% | 2036.8 | 1.2241 | 2.54% | 0.41% | 96.20% | 0.86% | 7.71% | 6.04% | 65.54% | 20.71% |
| 68.43% | 9.07%  | 22.50% | 2050.0 | 1.2349 | 2.49% | 0.44% | 96.22% | 0.85% | 7.55% | 6.53% | 65.40% | 20.52% |
| 70.29% | 6.89%  | 22.82% | 2077.5 | 1.2297 | 2.52% | 0.33% | 96.31% | 0.84% | 7.78% | 4.98% | 66.62% | 20.61% |
| 69.40% | 7.63%  | 22.97% | 2091.0 | 1.2405 | 2.47% | 0.36% | 96.33% | 0.83% | 7.62% | 5.47% | 66.48% | 20.43% |
| 68.49% | 8.38%  | 23.12% | 2104.5 | 1.2514 | 2.42% | 0.40% | 96.35% | 0.83% | 7.45% | 5.95% | 66.34% | 20.25% |
| 69.46% | 6.95%  | 23.60% | 2145.2 | 1.2569 | 2.41% | 0.32% | 96.45% | 0.81% | 7.52% | 4.91% | 67.40% | 20.16% |
| 68.55% | 7.69%  | 23.75% | 2159.1 | 1.2680 | 2.37% | 0.35% | 96.47% | 0.81% | 7.36% | 5.39% | 67.26% | 19.99% |
| 68.00% | 7.50%  | 24.50% | 2223.9 | 1.2923 | 2.28% | 0.33% | 96.60% | 0.78% | 7.17% | 5.15% | 68.07% | 19.61% |

**Table S2.** NiZn ferrites analysis (composition percentages, environmental impacts of both methodologies, and material and production percentages in both methodologies).

| Composition (%)                |        |        |                  |                                          | ReCiPe (%)                         |         |         |            | IPCC 2013 GWP 100y (%)             |         |         |            |
|--------------------------------|--------|--------|------------------|------------------------------------------|------------------------------------|---------|---------|------------|------------------------------------|---------|---------|------------|
| Fe <sub>2</sub> O <sub>4</sub> | ZnO    | NiO    | ReCiPe<br>(mPts) | IPCC<br>2013 (Kg<br>CO <sub>2</sub> eq.) | Fe <sub>2</sub> O <sub>4</sub> RMA | ZnO RMA | NiO RMA | Production | Fe <sub>2</sub> O <sub>4</sub> RMA | ZnO RMA | NiO RMA | Production |
| 68.50%                         | 28.60% | 2.90%  | 271.0            | 0.9340                                   | 18.83%                             | 10.48%  | 64.26%  | 6.43%      | 9.99%                              | 27.20%  | 35.68%  | 27.14%     |
| 68.53%                         | 28.19% | 3.28%  | 293.5            | 0.9740                                   | 17.40%                             | 9.54%   | 67.12%  | 5.94%      | 9.58%                              | 25.71%  | 38.69%  | 26.02%     |
| 68.55%                         | 27.80% | 3.65%  | 315.0            | 1.0126                                   | 16.21%                             | 8.76%   | 69.49%  | 5.53%      | 9.22%                              | 24.39%  | 41.36%  | 25.03%     |
| 68.57%                         | 27.42% | 4.01%  | 336.7            | 1.0512                                   | 15.17%                             | 8.09%   | 71.56%  | 5.18%      | 8.88%                              | 23.17%  | 43.84%  | 24.11%     |
| 68.60%                         | 27.03% | 4.38%  | 358.3            | 1.0898                                   | 14.26%                             | 7.49%   | 73.38%  | 4.87%      | 8.57%                              | 22.03%  | 46.15%  | 23.26%     |
| 68.62%                         | 26.64% | 4.74%  | 379.9            | 1.1285                                   | 13.46%                             | 6.96%   | 74.99%  | 4.59%      | 8.28%                              | 20.97%  | 48.29%  | 22.46%     |
| 68.64%                         | 26.25% | 5.11%  | 401.6            | 1.1672                                   | 12.73%                             | 6.49%   | 76.43%  | 4.34%      | 8.01%                              | 19.98%  | 50.30%  | 21.71%     |
| 68.66%                         | 25.86% | 5.48%  | 423.2            | 1.2059                                   | 12.09%                             | 6.07%   | 77.73%  | 4.12%      | 7.75%                              | 19.05%  | 52.18%  | 21.02%     |
| 68.68%                         | 25.47% | 5.84%  | 444.9            | 1.2447                                   | 11.50%                             | 5.68%   | 78.90%  | 3.92%      | 7.51%                              | 18.18%  | 53.95%  | 20.36%     |
| 68.71%                         | 25.08% | 6.21%  | 466.6            | 1.2834                                   | 10.97%                             | 5.34%   | 79.96%  | 3.74%      | 7.29%                              | 17.36%  | 55.60%  | 19.75%     |
| 68.73%                         | 24.69% | 6.58%  | 488.3            | 1.3222                                   | 10.49%                             | 5.02%   | 80.92%  | 3.57%      | 7.08%                              | 16.59%  | 57.17%  | 19.17%     |
| 68.75%                         | 24.30% | 6.95%  | 510.0            | 1.3610                                   | 10.04%                             | 4.73%   | 81.81%  | 3.42%      | 6.88%                              | 15.86%  | 58.64%  | 18.62%     |
| 68.78%                         | 23.91% | 7.31%  | 531.7            | 1.3999                                   | 9.64%                              | 4.46%   | 82.62%  | 3.28%      | 6.69%                              | 15.17%  | 60.03%  | 18.11%     |
| 68.80%                         | 23.52% | 7.68%  | 553.5            | 1.4388                                   | 9.26%                              | 4.22%   | 83.37%  | 3.15%      | 6.51%                              | 14.52%  | 61.35%  | 17.62%     |
| 68.82%                         | 23.13% | 8.05%  | 575.2            | 1.4777                                   | 8.91%                              | 3.99%   | 84.06%  | 3.03%      | 6.34%                              | 13.90%  | 62.60%  | 17.15%     |
| 68.84%                         | 22.74% | 8.42%  | 597.0            | 1.5166                                   | 8.59%                              | 3.78%   | 84.71%  | 2.92%      | 6.18%                              | 13.32%  | 63.79%  | 16.71%     |
| 68.87%                         | 22.35% | 8.79%  | 618.8            | 1.5555                                   | 8.29%                              | 3.59%   | 85.31%  | 2.82%      | 6.03%                              | 12.76%  | 64.92%  | 16.29%     |
| 68.89%                         | 21.95% | 9.16%  | 640.6            | 1.5945                                   | 8.01%                              | 3.40%   | 85.86%  | 2.72%      | 5.88%                              | 12.23%  | 65.99%  | 15.90%     |
| 68.91%                         | 21.56% | 9.53%  | 662.4            | 1.6335                                   | 7.75%                              | 3.23%   | 86.39%  | 2.63%      | 5.74%                              | 11.72%  | 67.01%  | 15.52%     |
| 68.93%                         | 21.17% | 9.90%  | 684.3            | 1.6725                                   | 7.51%                              | 3.07%   | 86.88%  | 2.55%      | 5.61%                              | 11.24%  | 67.99%  | 15.15%     |
| 68.96%                         | 20.78% | 10.27% | 706.1            | 1.7116                                   | 7.28%                              | 2.92%   | 87.33%  | 2.47%      | 5.49%                              | 10.78%  | 68.92%  | 14.81%     |

|        |        |        |        |        |       |       |        |       |       |        |        |        |
|--------|--------|--------|--------|--------|-------|-------|--------|-------|-------|--------|--------|--------|
| 68.98% | 20.38% | 10.64% | 728.0  | 1.7506 | 7.06% | 2.78% | 87.77% | 2.39% | 5.37% | 10.34% | 69.81% | 14.48% |
| 69.00% | 19.99% | 11.01% | 749.8  | 1.7897 | 6.86% | 2.65% | 88.17% | 2.32% | 5.25% | 9.92%  | 70.67% | 14.16% |
| 69.02% | 19.60% | 11.38% | 771.7  | 1.8289 | 6.66% | 2.52% | 88.56% | 2.26% | 5.14% | 9.52%  | 71.48% | 13.86% |
| 69.05% | 19.20% | 11.75% | 793.6  | 1.8680 | 6.48% | 2.40% | 88.92% | 2.20% | 5.03% | 9.13%  | 72.27% | 13.57% |
| 69.07% | 18.81% | 12.12% | 815.5  | 1.9072 | 6.31% | 2.29% | 89.26% | 2.14% | 4.93% | 8.76%  | 73.02% | 13.29% |
| 69.09% | 18.42% | 12.49% | 837.5  | 1.9464 | 6.15% | 2.18% | 89.59% | 2.08% | 4.83% | 8.40%  | 73.74% | 13.02% |
| 69.12% | 18.02% | 12.86% | 859.4  | 1.9856 | 5.99% | 2.08% | 89.90% | 2.03% | 4.74% | 8.06%  | 74.43% | 12.76% |
| 69.14% | 17.63% | 13.24% | 881.4  | 2.0249 | 5.84% | 1.99% | 90.19% | 1.98% | 4.65% | 7.73%  | 75.10% | 12.52% |
| 69.16% | 17.23% | 13.61% | 903.4  | 2.0642 | 5.70% | 1.89% | 90.47% | 1.93% | 4.56% | 7.42%  | 75.74% | 12.28% |
| 69.18% | 16.84% | 13.98% | 925.4  | 2.1035 | 5.57% | 1.81% | 90.74% | 1.88% | 4.48% | 7.11%  | 76.36% | 12.05% |
| 69.21% | 16.44% | 14.35% | 947.4  | 2.1428 | 5.44% | 1.72% | 90.99% | 1.84% | 4.40% | 6.82%  | 76.96% | 11.83% |
| 69.23% | 16.05% | 14.73% | 969.4  | 2.1821 | 5.32% | 1.64% | 91.24% | 1.80% | 4.32% | 6.53%  | 77.53% | 11.61% |
| 69.00% | 16.00% | 15.00% | 985.7  | 2.2130 | 5.22% | 1.61% | 91.40% | 1.77% | 4.25% | 6.42%  | 77.88% | 11.45% |
| 69.25% | 15.65% | 15.10% | 991.4  | 2.2215 | 5.20% | 1.57% | 91.47% | 1.76% | 4.24% | 6.26%  | 78.09% | 11.41% |
| 69.27% | 15.25% | 15.47% | 1013.5 | 2.2609 | 5.09% | 1.49% | 91.69% | 1.72% | 4.17% | 5.99%  | 78.63% | 11.21% |
| 69.30% | 14.86% | 15.85% | 1035.5 | 2.3004 | 4.99% | 1.42% | 91.91% | 1.68% | 4.10% | 5.74%  | 79.14% | 11.02% |
| 69.32% | 14.46% | 16.22% | 1057.6 | 2.3398 | 4.88% | 1.36% | 92.11% | 1.65% | 4.03% | 5.49%  | 79.64% | 10.83% |
| 69.34% | 14.06% | 16.59% | 1079.7 | 2.3793 | 4.78% | 1.29% | 92.31% | 1.61% | 3.97% | 5.25%  | 80.13% | 10.65% |
| 69.37% | 13.67% | 16.97% | 1101.8 | 2.4188 | 4.69% | 1.23% | 92.50% | 1.58% | 3.91% | 5.02%  | 80.60% | 10.48% |
| 69.39% | 13.27% | 17.34% | 1123.9 | 2.4584 | 4.60% | 1.17% | 92.68% | 1.55% | 3.84% | 4.79%  | 81.05% | 10.31% |
| 69.41% | 12.87% | 17.72% | 1146.1 | 2.4980 | 4.51% | 1.11% | 92.85% | 1.52% | 3.78% | 4.58%  | 81.49% | 10.15% |
| 69.44% | 12.47% | 18.09% | 1168.2 | 2.5375 | 4.43% | 1.06% | 93.02% | 1.49% | 3.73% | 4.37%  | 81.92% | 9.99%  |
| 69.46% | 12.07% | 18.47% | 1190.4 | 2.5772 | 4.35% | 1.01% | 93.18% | 1.46% | 3.67% | 4.16%  | 82.33% | 9.83%  |
| 69.48% | 11.68% | 18.84% | 1212.6 | 2.6168 | 4.27% | 0.96% | 93.34% | 1.44% | 3.62% | 3.96%  | 82.74% | 9.69%  |
| 69.50% | 11.28% | 19.22% | 1234.8 | 2.6565 | 4.19% | 0.91% | 93.49% | 1.41% | 3.56% | 3.77%  | 83.13% | 9.54%  |
| 69.53% | 10.88% | 19.59% | 1257.0 | 2.6962 | 4.12% | 0.86% | 93.63% | 1.39% | 3.51% | 3.58%  | 83.50% | 9.40%  |
| 69.55% | 10.48% | 19.97% | 1279.2 | 2.7359 | 4.05% | 0.81% | 93.77% | 1.36% | 3.46% | 3.40%  | 83.87% | 9.26%  |
| 69.57% | 10.08% | 20.35% | 1301.4 | 2.7757 | 3.98% | 0.77% | 93.91% | 1.34% | 3.41% | 3.23%  | 84.23% | 9.13%  |

|        |       |        |        |        |       |       |        |       |       |       |        |       |
|--------|-------|--------|--------|--------|-------|-------|--------|-------|-------|-------|--------|-------|
| 69.60% | 9.68% | 20.72% | 1323.7 | 2.8154 | 3.92% | 0.73% | 94.04% | 1.32% | 3.37% | 3.05% | 84.58% | 9.00% |
| 69.62% | 9.28% | 21.10% | 1346.0 | 2.8552 | 3.85% | 0.68% | 94.17% | 1.30% | 3.32% | 2.89% | 84.92% | 8.88% |
| 69.64% | 8.88% | 21.48% | 1368.2 | 2.8951 | 3.79% | 0.64% | 94.29% | 1.27% | 3.28% | 2.72% | 85.25% | 8.75% |
| 69.67% | 8.48% | 21.86% | 1390.5 | 2.9349 | 3.73% | 0.61% | 94.41% | 1.25% | 3.23% | 2.57% | 85.57% | 8.64% |
| 69.69% | 8.08% | 22.23% | 1412.9 | 2.9748 | 3.67% | 0.57% | 94.52% | 1.23% | 3.19% | 2.41% | 85.88% | 8.52% |
| 69.71% | 7.67% | 22.61% | 1435.2 | 3.0147 | 3.62% | 0.53% | 94.64% | 1.21% | 3.15% | 2.26% | 86.18% | 8.41% |
| 69.74% | 7.27% | 22.99% | 1457.5 | 3.0547 | 3.56% | 0.50% | 94.74% | 1.20% | 3.11% | 2.11% | 86.48% | 8.30% |
| 69.76% | 6.87% | 23.37% | 1479.9 | 3.0946 | 3.51% | 0.46% | 94.85% | 1.18% | 3.07% | 1.97% | 86.77% | 8.19% |
| 69.78% | 6.47% | 23.75% | 1502.3 | 3.1346 | 3.46% | 0.43% | 94.95% | 1.16% | 3.03% | 1.83% | 87.05% | 8.09% |
| 69.81% | 6.07% | 24.13% | 1524.6 | 3.1746 | 3.41% | 0.40% | 95.05% | 1.14% | 2.99% | 1.70% | 87.32% | 7.98% |
| 69.83% | 5.66% | 24.51% | 1547.0 | 3.2147 | 3.36% | 0.36% | 95.15% | 1.13% | 2.96% | 1.57% | 87.59% | 7.88% |
| 69.85% | 5.26% | 24.89% | 1569.5 | 3.2547 | 3.32% | 0.33% | 95.24% | 1.11% | 2.92% | 1.44% | 87.85% | 7.79% |
| 69.88% | 4.86% | 25.27% | 1591.9 | 3.2948 | 3.27% | 0.30% | 95.33% | 1.10% | 2.89% | 1.31% | 88.11% | 7.69% |
| 69.90% | 4.46% | 25.65% | 1614.3 | 3.3350 | 3.23% | 0.27% | 95.42% | 1.08% | 2.85% | 1.19% | 88.36% | 7.60% |
| 69.92% | 4.05% | 26.03% | 1636.8 | 3.3751 | 3.18% | 0.25% | 95.51% | 1.07% | 2.82% | 1.07% | 88.60% | 7.51% |
| 69.95% | 3.65% | 26.41% | 1659.3 | 3.4153 | 3.14% | 0.22% | 95.59% | 1.05% | 2.79% | 0.95% | 88.84% | 7.42% |
| 69.97% | 3.24% | 26.79% | 1681.8 | 3.4555 | 3.10% | 0.19% | 95.67% | 1.04% | 2.76% | 0.83% | 89.07% | 7.33% |
| 70.00% | 3.20% | 26.80% | 1682.5 | 3.4565 | 3.10% | 0.19% | 95.68% | 1.03% | 2.76% | 0.82% | 89.09% | 7.33% |
